# Supplementary material
Source: publisher site journal article supplement (https://www.dovepress.com/get_supplementary_file.php?f=373115.docx)
Supplement: Supplementary file 1 [file get_supplementary_file.php]

| **Supplementary Table 1.** Reports of patients with pyoderma gangrenosum associated autoinflammatory syndromes treated with adalimumab | | | | | | | |
| --- | --- | --- | --- | --- | --- | --- | --- |
| **Case no.** | **First author**  **(year)** | **Age/**  **sex** | **Location of pyoderma gangrenosum** | **Pyoderma gangrenosum associated autoinflammatory syndromes** | **Concomitant diseases** | **Concomitant medication** | **Adalimumab therapy** | **Response to therapy** |
| 1 | Lee H (2012)1 | 26/M | Left leg | PAPA | None | Prednisolone | 40mg semi-weekly | Good control after 4 months |
| 2 | Demidowich AP (2012)2 | 20/M | Arm | PAPA | None | Methotrexate, prednisone | 40mg every other week | Excellent control after 15 months |
| 3 | Sood AK, (2019)3 | 12/W | Left breast | PAPA | Recurrent purulent otitis media | Tacrolimus | 40mg every other week | Excellent control after 18 months |
| 4 | Gottlieb J (2019) 4 | 32/W | NA | PASS | None | Sirolimus | 40mg weekly after loading doses | Remission but the time to take effect is NA |
| 5 | Gottlieb J (2019) 4 | 19/W | Lower limbs | PASS | None | Methotrexate | 40mg weekly after loading doses | Remission but the time to take effect is NA |
| 6 | Gottlieb J (2019) 4 | 20/M | Four limbs | PASS | None | None | 40mg weekly after loading doses | Remission but the time to take effect is NA |
| 7 | Gottlieb J (2019) 4 | 40/W | NA | PsAPASH | None | Methotrexate | 40mg weekly after loading doses | Remission but the time to take effect is NA |
| 8 | Saraceno R  (2015) 5 | 50/M | Right leg | PsAPASH | Diabetes mellitus type 2, arterial hypertension, hiatal hernia, depression,  hypertriglyceridemia | None | 40mg every other week | Remission after 4 weeks |
| 9 | Gadelha RL (2020)6 | 22/W | Left breast | PsAPASH | None | None | 40mg at week0 and 20mg at week2, followed by 10mg per week | Present important improvement after 2 months |
| 10 | Marzano AV (2014)7 | 23/M | Lower extremities | PASH | Crohn’s disease | None | 80mg at week 0 and 40mg every other week | Good control within 4 weeks |
| 11 | Murphy B (2015)8 | 26/W | Left axilla | PASH | After colectomy for ulcerative colitis | None | Induction of 160mg/80mg followed by maintenance of 40mg every other week | Markedly improved within 2 months |
| 12 | Zagaria O (2020)9 | 39/M | Left leg | PASH | Hypertension,  obesity, dyslipidaemia, diabetes mellitus type 2 | Rifampicin and clindamycin | 160mg at week 0, 80mg at week 2, and 40mg every week from week 4 onwards | Great  improvement after 8 weeks |
| 13 | Staub J (2015)10 | 22/W | Lower legs | PASH | None | Cyclosporine, dapsone | NA | No improvement after 5 months |
| 14 | de Wet J (2017)11 | 42/M | Upper and lower extremities, trunk, groin | PASH | Chronic renal failure | Rifampicin and clindamycin | 160mg at week 0, 80mg at week 2, and 40mg per week for weeks 4-8 | Remarkable response at 8-weeks |
| 15 | Pierret L (2016)12 | 39/W | Lower legs | PAPASH | None | Steroids | NA | Under control (the time to take effect is NA) |
|  | | | | | | | | |

NA (not available); PAPA syndrome (pyogenic arthritis, pyoderma gangrenosum and acne); PASS (pyoderma gangrenosum, acne, suppurative hidradenitis and ankylosing spondylitis); PsAPASH (psoriatic arthritis, pyoderma gangrenosum, acne, suppurative hidradenitis); PASH (pyoderma gangrenosum, acne, suppurative hidradenitis); PAPASH (pyoderma gangrenosum, acne, psoriasis, arthritis and suppurative hidradenitis)

References

1. Lee H, Park SH, Kim SK, et al. Pyogenic arthritis, pyoderma gangrenosum, and acne syndrome (PAPA syndrome) with E250K mutation in CD2BP1 gene treated with the tumor necrosis factor inhibitor adalimumab. Clin Exp Rheumatol. 2012;30:452.

2. Demidowich AP, Freeman AF, Kuhns DB, et al. Brief report: genotype, phenotype, and clinical course in five patients with PAPA syndrome (pyogenic sterile arthritis, pyoderma gangrenosum, and acne). Arthritis Rheum. 2012;64:2022-7.

3. Sood AK, McShane DB, Googe PB, et al. Successful Treatment of PAPA Syndrome with Dual Adalimumab and Tacrolimus Therapy. J Clin Immunol. 2019;39:832-5.

4. Gottlieb J, Madrange M, Gardair C, et al. PAPASH, PsAPASH and PASS autoinflammatory syndromes: phenotypic heterogeneity, common biological signature and response to immunosuppressive regimens. Br J Dermatol. 2019;181:866-9.

5. Saraceno R, Babino G, Chiricozzi A, et al. PsAPASH: a new syndrome associated with hidradenitis suppurativa with response to tumor necrosis factor inhibition. J Am Acad Dermatol. 2015;72:e42-4.

6. Gadelha RL, Paiva R, Palitot EB, et al. PsAPASH: a rare and recent autoinflammatory syndrome associated with hidradenitis suppurativa. An Bras Dermatol. 2020;95:203-6.

7. Marzano AV, Ceccherini I, Gattorno M, et al. Association of pyoderma gangrenosum, acne, and suppurative hidradenitis (PASH) shares genetic and cytokine profiles with other autoinflammatory diseases. Medicine (Baltimore). 2014;93:e187.

8. Murphy B, Morrison G, Podmore P. Successful use of adalimumab to treat pyoderma gangrenosum, acne and suppurative hidradenitis (PASH syndrome) following colectomy in ulcerative colitis. Int J Colorectal Dis. 2015;30:1139-40.

9. Zagaria O, Ruggiero A, Fabbrocini G, et al. Wound care, adalimumab, and multidisciplinary approach in a patient affected by PASH syndrome. Int Wound J. 2020;17:1528-31.

10. Staub J, Pfannschmidt N, Strohal R, et al. Successful treatment of PASH syndrome with infliximab, cyclosporine and dapsone. J Eur Acad Dermatol Venereol. 2015;29:2243-7.

11. de Wet J, Jordaan HF, Kannenberg SM, et al. Pyoderma gangrenosum, acne, and suppurative hidradenitis syndrome in end-stage renal disease successfully treated with adalimumab. Dermatol Online J. 2017;23.

12. Pierret L, Grosber M, Gutermuth J. Is isotretinoin treatment safe in patients with known peanut allergy? J Eur Acad Dermatol Venereol. 2016;30:140-1.
